# Supplementary material for: New tris- and pentakis-fused donors containing extended tetrathiafulvalenes: New positive electrode materials for rechargeable batteries
Source: publisher site journal article supplement (doi:10.3762/bjoc.11.128), 2015-07-08
Supplement: Additional file 1 [file 1860-5397-11-128-S1.pdf]

**Supporting Information  
for**

**New tris- and pentakis-fused donors containing extended  
tetrathiafulvalenes: New positive electrode materials for  
rechargeable batteries**

Shintaro Iwamoto<sup>1,2</sup>, Yuu Inatomi<sup>1,3</sup>, Daisuke Ogi<sup>1</sup>, Satoshi Shibayama<sup>1</sup>, Yukiko Murakami<sup>1</sup>,  
Minami Kato<sup>1</sup>, Kazuyuki Takahashi<sup>4</sup>, Kazuyoshi Tanaka<sup>2</sup>, Nobuhiko Hojo<sup>3</sup> and Yohji  
Misaki<sup>\*1,5</sup>

Address: <sup>1</sup>Department of Applied Chemistry, Graduate School of Science and Engineering,  
Ehime University, 3 Bunkyo-cho, Matsuyama, Ehime 790-8577, Japan, <sup>2</sup>Department,  
Molecular Engineering, Graduate School of Engineering, Kyoto University, Katsura, Kyoto  
615-8520, Japan, <sup>3</sup>Panasonic Corporation, 1006 Kadoma, Kadoma, Osaka 571-8501, Japan,  
<sup>4</sup>Department of Chemistry, Graduate School of Science, Kobe University, 1-1 Rokkodai-cho,  
Nada-ku, Kobe 657-8501, Japan and <sup>5</sup>Elements Strategy Initiative for Catalysts and Batteries  
(ESICB), Kyoto University, Katsura, Kyoto 615-8520, Japan

Email: Yohji Misaki - misaki.yohji.mx@ehime-u.ac.jp

\*Corresponding author

**Experimental details and spectroscopic data, optimized structures of **5a**, **6a**  
and **8a** (*trans* isomers) and cycle-life performances for rechargeable  
batteries using **5c**, **5b** and **6b**.**

**Contents**

|                                                                                                             |    |
|-------------------------------------------------------------------------------------------------------------|----|
| 1. Experimental details                                                                                     | s2 |
| 2. Theoretical calculations for <b>5a</b> , <b>6a</b> and <b>8a</b> (Figures S1–S3).                        | s6 |
| 3. Cyclic voltammograms of positive electrodes (Figure S4)                                                  | s8 |
| 4. Cycle-life performances for rechargeable batteries using <b>5b</b> , <b>5c</b> and <b>6b</b> (Figure S5) | s9 |

## 1. Experimental details

### General

$^1\text{H}$  NMR spectra were recorded on JEOL NM-SCM270 or JEOL NM-EX400 instrument. Spectra are reported (in  $\delta$ ) with referenced to  $\text{Me}_4\text{Si}$ .  $\text{CDCl}_3$  was used as solvent. MS spectra were determined on an Applied Biosystem MALDI TOFMS Voyager-DE<sup>TM</sup> PRO. Only the more intense or structurally diagnostic mass spectral fragment ion peaks are reported. Melting points were determined with a Yanaco MP-J3. Cyclic voltammetries (CV) were recorded on an ALS/chi 617B Electrochemical analyzer. The CV cell consisted of the Pt working electrode, Pt wire counter electrode, and an  $\text{Ag}/\text{AgNO}_3$  reference electrode. The measurements were carried out in carbon disulfide/benzonitrile (2:1, v/v) solution of samples with a concentration of 0.1 M  $n\text{-Bu}_4\text{N}\cdot\text{PF}_6$  as a supporting electrolyte. All redox potentials were measured against  $\text{Ag}/\text{Ag}^+$  and converted to vs.  $\text{Fc}/\text{Fc}^+$ . The cyclic performance of the fabricated cell was examined by repeated charging–discharging galvanostatic cycles at different current densities using NAGANO-TS2005W.

### Preparation of electrodes and battery cells

In a similar manner as described in [11], the positive electrodes were prepared by mixing of the active material (**5b,c**, **6b**, **8c**, 20% weight), acetylene black (Denki Kagaku Kogyo) as the conductive additive (65%), and poly(tetrafluoroethylene) as the binder (15%). A mixed solution of ethylene carbonate and diethyl carbonate (1:5, v/v) containing 1.0 M  $\text{LiBF}_4$  was used as an electrolyte solution. A coin cell was fabricated by sandwiching the electrolyte layer of electrolyte solution with the cathode and the Li anode, using the separator film under dried air conditions.

### Electrochemical analyses of the positive electrodes and cells

In a similar manner as described in [11], electrochemical analyses were carried out in a conventional cell under dried air. The auxiliary electrode and reference electrode was a Li sheet. A Solartron 1287 Electrochemical analyzer was employed to obtain the voltammograms and charge-discharge cycle test. The cyclic performance of the fabricated cell was examined by repeated charging–discharging galvanostatic cycles at different current densities. The charging-discharging experiments were typically performed at a current density of  $40\text{ mA g}^{-1}$  (0.2 C) for charge and  $100\text{ mA g}^{-1}$  (0.5 C) for discharge processes.

## Synthesis of **12**

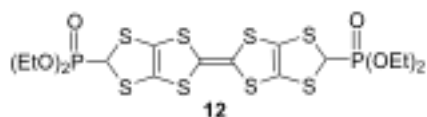

A mixture of **10** (3.1 g, 9.1 mmol) [21] and **11** (3.0 g, 9.1 mmol) [22-24] in trimethylphosphite (35 ml) and toluene (50 ml) was stirred at 110 °C for 2 h under argon atmosphere. After cooling to room temperature, hexane was added. The resulting precipitate was collected, washed with hexane, and then subjected to column chromatography on silica gel with dichloromethane/ethyl acetate (1:1, v/v). The crude product was reprecipitated from dichloromethane/hexane to give **12** (3.6 g, 5.7 mmol) as orange powder in 63% yield. m.p. 155.0-156.9 °C; <sup>1</sup>H NMR (270 MHz, C<sub>6</sub>D<sub>6</sub>, 25 °C, TMS): δ 5.17 (d, *J*=9.2 Hz, 1H), 5.06 (d, *J*=9.5 Hz, 1H), 4.00–4.11 (m, 8H), 1.3 (t, *J*=7.0 Hz, 12H); IR (KBr): 2979, 2898, 1252, 1050, 1024 cm<sup>-1</sup>; HR-MS (LDI-TOF): *m/z* found 627.8674 (M<sup>+</sup>), calcd for C<sub>16</sub>H<sub>22</sub>O<sub>6</sub>P<sub>2</sub>S<sub>8</sub> 627.8657.

## Synthesis of **5c**

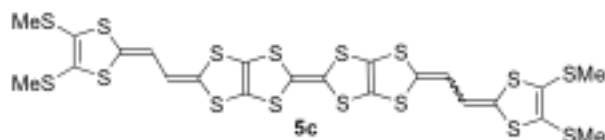

In a similar manner as described in [32], to a solution of **12** (150 mg, 0.24 mmol) and **13c** (125 mg, 0.53 mmol) [25] in THF (20 ml) was added a 0.5 M THF solution of LDA (1.16 ml, 0.58 mmol) at -78 °C. After the reaction mixture was stirred for 1 h, the reaction mixture was warmed up to -50 °C. After methanol (60 ml) was added to the reaction mixture, the resultant precipitation was filtered, and washed with methanol. The obtained solid was dried over *in vacuo* to afford **5c** (142 mg, 0.18 mmol) as orange powder 75% yield. orange powder; m.p. 220–221 °C; IR (KBr): 2988, 2913, 1532, 1510, 1490, 1426, 1268 cm<sup>-1</sup>; HR-MS (LDI-TOF): *m/z* found 791.6829 (M<sup>+</sup>), Calcd for C<sub>22</sub>H<sub>16</sub>S<sub>16</sub> 791.6783.

### Synthesis of **5b**

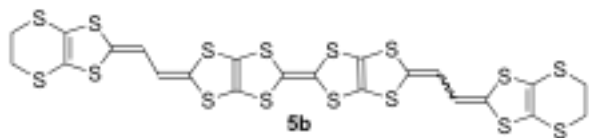

Compound **5b** was obtained from **12** (150 mg, 0.24 mmol) and **13b** (124 mg, 0.53 mmol) in 85% yield (160 mg, 0.20 mmol) in a similar manner as described for **5c**. **5b**: dark brown powder; m.p. 253–254 °C; IR: 2911, 2915, 1676, 1500, 1405 cm<sup>-1</sup>; HR-MS (LDI-TOF): *m/z* found 787.6489 (M<sup>+</sup>), Calcd for C<sub>22</sub>H<sub>12</sub>S<sub>16</sub> 787.6470.

### Synthesis of **5d**

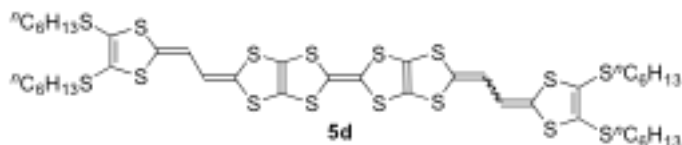

Compound **5d** was obtained from **12** (150 mg, 0.24 mmol) and **13d** (191 mg, 0.53 mmol) in 54% yield (142 mg, 0.13 mmol) in a similar manner as described for **5c**. **5d**: ocher powder; ocher powder; m.p. 162.2–164.0°C; <sup>1</sup>H NMR (400 MHz, C<sub>6</sub>D<sub>6</sub>, 25 °C, TMS): δ 5.79 (d, *J* = 10.4 Hz, 2H), 5.62 (d, *J* = 10.4 Hz, 2H), 2.65–2.69 (m, 8H), 1.51–1.57 (m, 8H), 1.26–1.34 (m, 24H), 0.88 (t, *J* = 6.80 Hz, 12H); IR (KBr): 2954, 2924, 2853, 1533, 1510, 1490, 1459 cm<sup>-1</sup>; HR-MS (LDI-TOF): *m/z* found 1071.9952 (M<sup>+</sup>), calcd for C<sub>42</sub>H<sub>56</sub>S<sub>16</sub> 1071.9913.

### Synthesis of **6b**

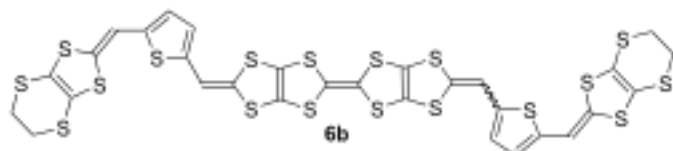

Compound **6b** was obtained from **12** (102 mg, 0.16 mmol) and **14b** (151 mg, 0.48 mmol) in 63% yield (96 mg, 0.10 mmol) in a similar manner as described for **5c**. **6b**: red brown powder; m.p. >300°C; IR (KBr): 3063, 2989, 2916, 1653, 1560, 1518, 1283, 1226, 1049 cm<sup>-1</sup>; HR-MS (LDI-TOF): *m/z* found 951.6175(M<sup>+</sup>), calcd for C<sub>30</sub>H<sub>16</sub>S<sub>18</sub> 951.6225.

### Synthesis of 6c

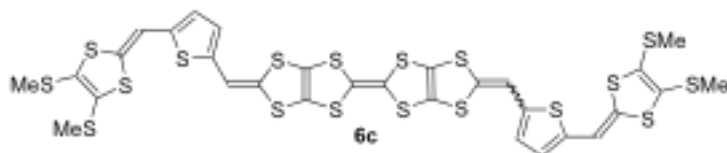

Compound **6c** was obtained from **12** (150 mg, 0.24 mmol) and **14c** (168 mg, 0.35 mmol) in 75% yield (172 mg, 0.18 mmol) in a similar manner as described for **5c**. **6c**: red brown powder; m.p. 161–163 °C;  $^1\text{H}$  NMR (270 MHz,  $\text{C}_6\text{D}_6$ , 25 °C, TMS):  $\delta$  6.64 (s, 2H), 6.53 (s, 2H), 6.43 (s, 2H), 2.31 (s, 12H); IR (KBr): 3060, 2989, 2952, 2915, 2850, 1567, 1428  $\text{cm}^{-1}$ ; HR-MS (LDI-TOF):  $m/z$  found 955.6440 ( $\text{M}^+$ ), calcd for  $\text{C}_{30}\text{H}_{20}\text{S}_{18}$  955.6538.

### Synthesis of 7d

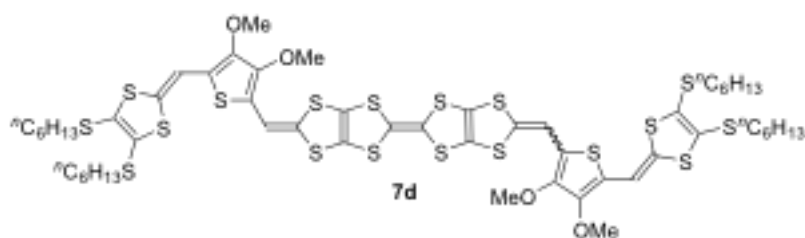

Compound **7d** was obtained from **12** (30 mg, 0.048 mmol) and **15d** (50 mg, 0.097 mmol) in 85% yield (55 mg, 0.041 mmol) in a similar manner as described for **5c**. **7d**: ochre powder; m.p. 65.5–70.0 °C;  $^1\text{H}$  NMR (270 MHz,  $\text{CDCl}_3$ , 25 °C, TMS):  $\delta$  6.79 (s, 2H), 6.69 (s, 2H), 3.85 (s, 6H), 3.83 (s, 6H), 2.80–2.90 (m, 8H), 1.63–1.71 (m, 8H), 0.88–1.45 (m, 24H), 0.90 (t,  $J = 6.48$  Hz, 12H); IR (KBr): 2953, 2925, 2854, 1575, 1466, 1399, 1294, 1054  $\text{cm}^{-1}$ ; HR-MS (LDI-TOF):  $m/z$  found 1356.1409 ( $\text{M}^+$ ), calcd for  $\text{C}_{54}\text{H}_{68}\text{O}_4\text{S}_{18}$  1356.0090.

### Synthesis of 8c

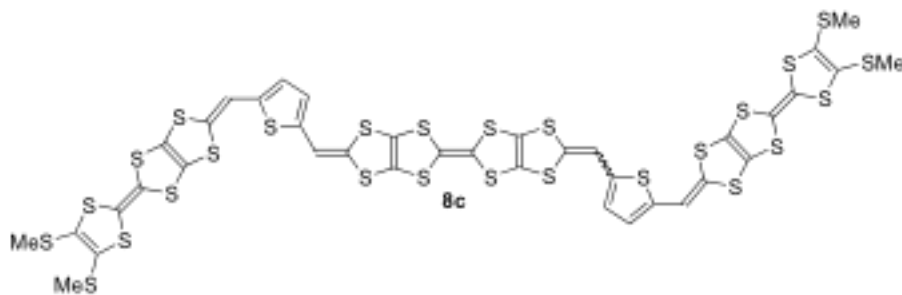

Compound **8c** was obtained from **12** (60 mg, 0.095 mmol) and **16c** (104 mg, 0.21 mmol) in 62% yield (77 mg, 0.059 mmol) in a similar manner as described for **5c**. **8c**: red brown; m.p. >300°C; IR (KBr): 3062, 2990, 2915, 1568, 1509, 1426, 1043  $\text{cm}^{-1}$ ; HR-MS (LDI-TOF):  $m/z$  found 1307.4324 ( $\text{M}^+$ ), calcd for  $\text{C}_{38}\text{H}_{20}\text{S}_{26}$  1307.4303.

## Synthesis of **9d**

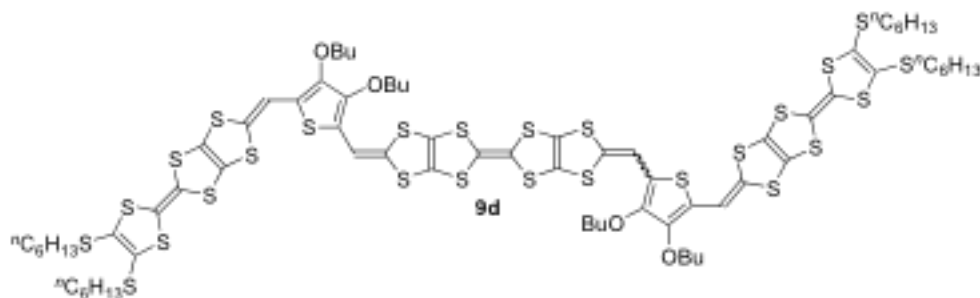

Compound **9d** was obtained from **12** (74 mg, 0.16 mmol) and **17d** (183 mg, 0.24 mmol) in 28% yield (63 mg, 0.034 mmol) in a similar manner as described for **5c**. **9d**: red brown; m.p. 98–101 °C;  $^1\text{H}$  NMR (400 MHz,  $\text{CDCl}_3$ , 25 °C, TMS):  $\delta$  6.693 (s, 1H), 6.689 (s, 1H), 6.68 (s, 2H), 3.880 (t,  $J$  = 6.6 Hz, 4H), 3.876 (t,  $J$  = 6.6 Hz, 4H), 2.72 (t,  $J$  = 6.80 Hz, 4H), 2.71 (t,  $J$  = 6.80 Hz, 4H), 1.54–1.64 (m, 16H), 1.27–1.44 (m, 32H), 0.94 (t,  $J$  = 7.4 Hz, 12H), 0.89 (t,  $J$  = 7.0 Hz, 12H); IR (KBr): 2954, 2925, 2868, 1445, 1374, 1291, 1065  $\text{cm}^{-1}$ ; HR-MS (LDI-TOF):  $m/z$  found 1875.9711( $\text{M}^+$ ), calcd for  $\text{C}_{74}\text{H}_{92}\text{O}_4\text{S}_{26}$  1875.9734.

## 2. Theoretical calculations for **5a**, **6a** and **8a**.

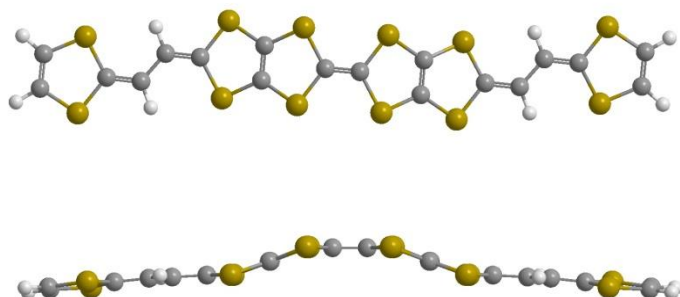

**Figure S1.** Optimized structures of **5a** (trans isomer).

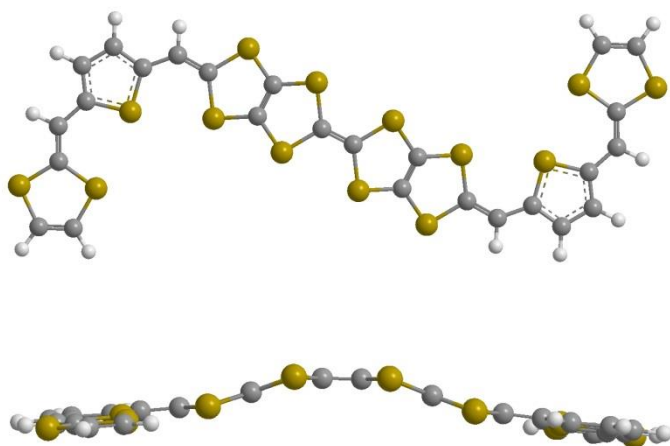

**Figure S2.** Optimized structures of **6a** (trans isomer).

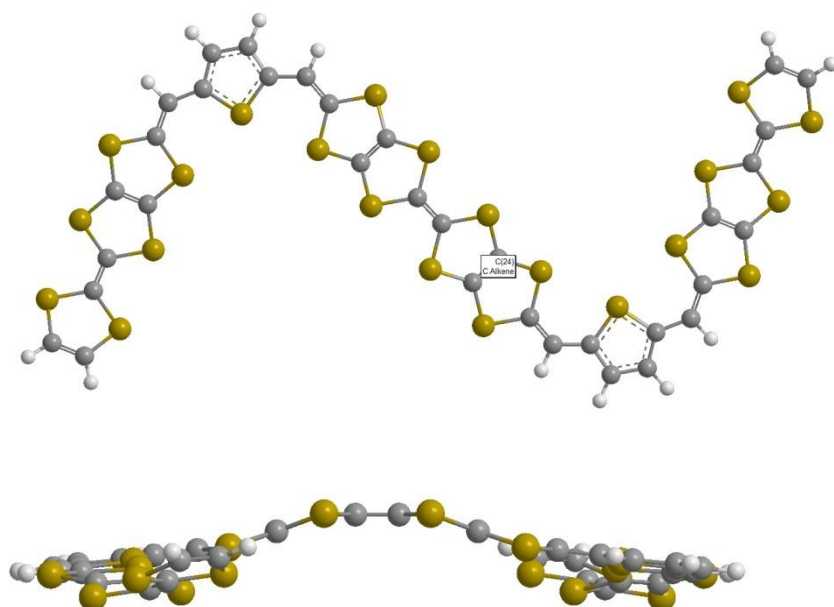

**Figure S3.** Optimized structures of **8a** (trans isomer).

### 3. Cyclic voltammograms of positive electrodes.

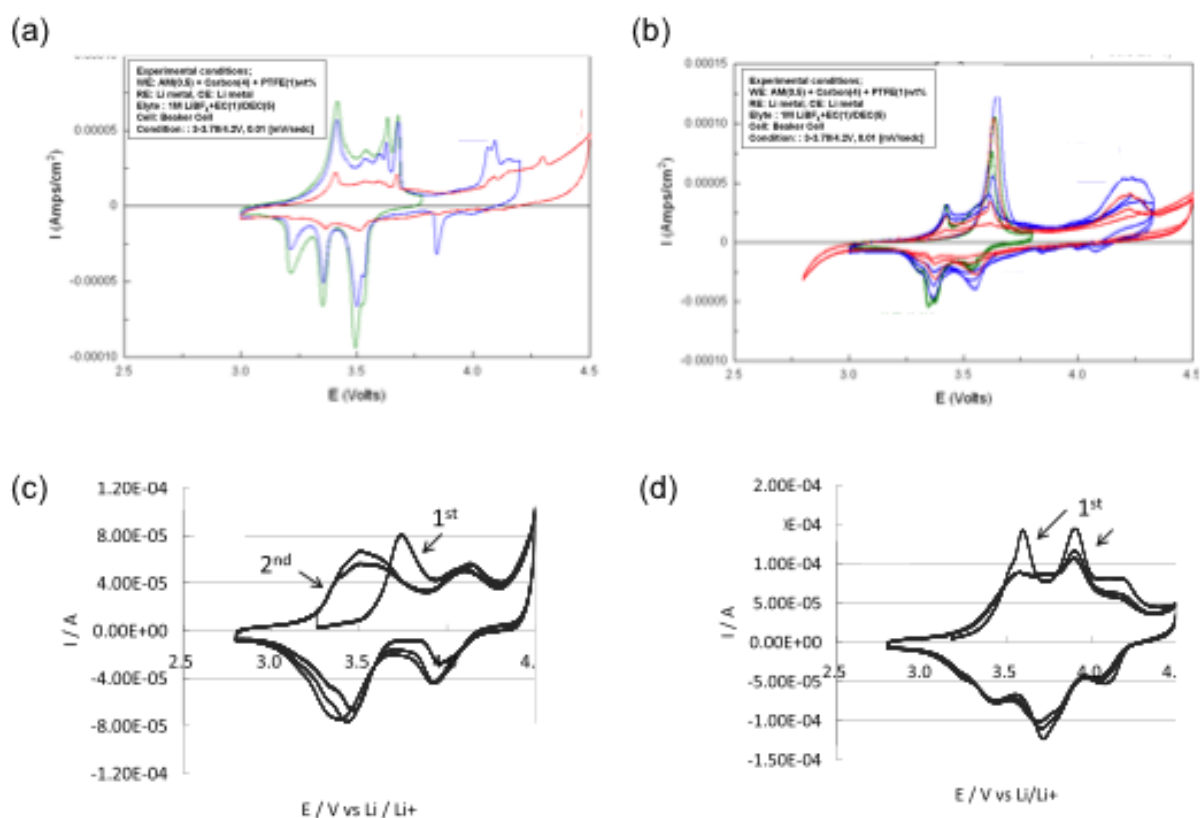

**Figure S4.** Cyclic voltammograms of positive electrodes using (a) **5b**, (b) **5c**, (c) **6b** and (d) **8c** as positive electrode materials.



#### 4. Cycle-life performances for rechargeable batteries using **5b**, **5c** and **6b**.

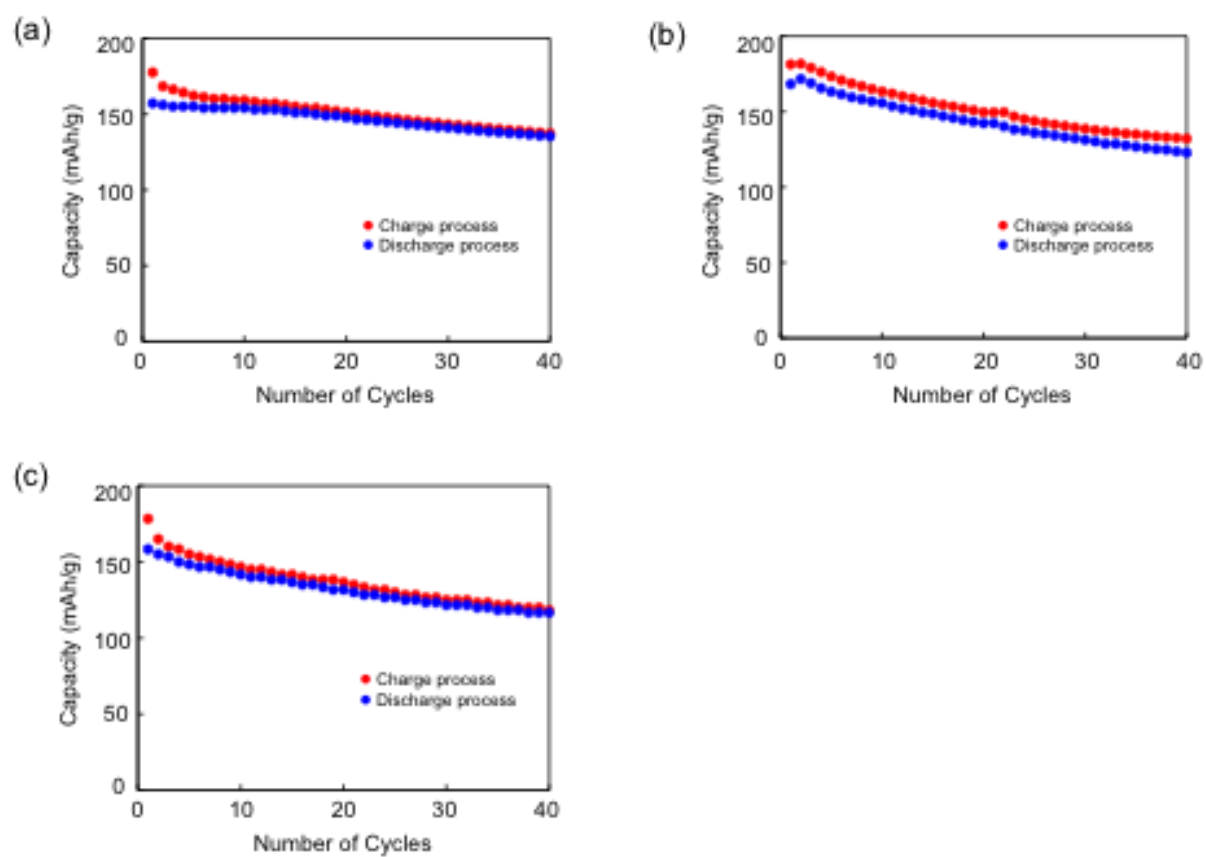

**Figure S5.** Cycle-life performances for (a) **5b**/Li, (b) **5c**/Li and (c) **6b**/Li cells.
